# Supplementary material for: The mechanosensitive Piezo1 channel is required for bone formation
Source: eLife journal article supplement (doi:10.7554/elife.47454), 2019-07-10
Supplement: supp [file a.xlsx]

## Sheet: Sheet1
	Ctrl- Piezo1fl/fl	HS-Piezo1fl/fl	Ctrl-Piezo1Ocn/Ocn	HS-Piezo1Ocn/Ocn
	0.67445	0.645118	0.245807	0.41956
	0.86821	0.716751	0.206833	0.19043
	0.8675	0.267859	0.223929	0.48852
	1.28814	0.378216	0.268978	0.257262
	1.15261	0.400838	0.43054	0.275503
	1.14913	0.773009	0.303315	0.222603
