# Supplementary material for: The mechanosensitive Piezo1 channel is required for bone formation
Source: eLife journal article supplement (doi:10.7554/elife.47454), 2019-07-10
Supplement: supp [file a.xlsx]

## Sheet: Sheet1
	Ctrl-Piezo1fl/fl	Ex-Piezo1fl/fl	Ctrl-Piezo1Ocn/Ocn	Ex-Piezo1Ocn/Ocn
	0.919042	1.97664	0.123114	0.405582
	1.048	1.55496	0.221913	0.278947
	0.925435	1.56375	0.24794	0.229738
	1.10747	2.52937		0.320426
		1.43532
