# Supplementary material for: The mechanosensitive Piezo1 channel is required for bone formation
Source: eLife journal article supplement (doi:10.7554/elife.47454), 2019-07-10
Supplement: supp [file b.xlsx]

## Sheet: Sheet1
	Ctrl- Piezo1fl/fl	HS-Piezo1fl/fl	Ctrl-Piezo1Ocn/Ocn	HS-Piezo1Ocn/Ocn	HS-Piezo1Ocn/Ocn
	0.922645	0.721658	0.067526	0.186469
	1.42813	0.549843	0.182084	0.180095
	1.87097	0.499202	0.375745	0.271697
