# Supplementary material for: The mechanosensitive Piezo1 channel is required for bone formation
Source: eLife journal article supplement (doi:10.7554/elife.47454), 2019-07-10
Supplement: supp [file b.xlsx]

## Sheet: Sheet1
	Ctrl-Piezo1fl/fl	HS-Piezo1fl/fl	Ctrl-Piezo1Ocn/Ocn	HS-Piezo1Ocn/Ocn
BMD	201.517	106.222	70.184	50.9821
	104.846	84.5949	56.6414	40.4679
	127.926	100.357	57.7612	40.0035
	200.922	66.956	50.3433	90.209
	169.772	80.8991	50.7091	68.4417
	101.656	81.5903	54.1805	99.4037
BV/TV(%)	19.58	10.52	4.15	3.09
	13.46	9.15	7.3	7.93
	17.1	11.18	7.56	5.91
	17.41	8.39	1.74	9.93
	19.52	3.91	1.97	8.91
	13.55	4.21	7.29	9.17
Tb.N	6.091	3.247	2.8718	2.4587
	4.2949	4.0372	3.2639	3.3042
	5.2784	4.4306	2.994	2.5976
	4.6203	3.8697	2.1604	4.326
	4.5977	3.0824	2.1177	4.1305
	3.766	2.6282	3.3469	4.5071
Tb.Th	61.8	50.3	34	44.1
	51.2	45.1	37.1	46.8
	51	47.4	41.7	51.6
	78.1	45.1	34.6	42.8
	70.8	42.7	40.9	42.1
	61.7	41.2	32.4	45.6
