# Supplementary material for: The mechanosensitive Piezo1 channel is required for bone formation
Source: eLife journal article supplement (doi:10.7554/elife.47454), 2019-07-10
Supplement: supp [file c.xlsx]

## Sheet: Sheet1
	Ctrl	MG
	0.890588	0.493501
	1.01748	0.472866
	1.09198	0.612874
