# Supplementary material for: The mechanosensitive Piezo1 channel is required for bone formation
Source: eLife journal article supplement (doi:10.7554/elife.47454), 2019-07-10
Supplement: supp [file c.xlsx]

## Sheet: Sheet1
	Ctrl-Piezo1fl/fl				Ex-Piezo1fl/fl					Ctrl-Piezo1Ocn/Ocn			Ex-Piezo1Ocn/Ocn
Alp	0.922228	0.848948	1.15274	1.07606	1.28873	1.68937	1.60524	1.34051	1.47712	0.429764	0.428067	0.55267	0.424393	0.513986	0.333508	0.529531
Bglap	0.91534	0.880457	1.06994	1.13426	2.60284	3.22972	1.62915	2.68124	2.09732	0.394017	0.512751	0.44023	0.606751	0.563483	0.745526	0.874379
Col1α1	0.909221	0.66173	1.4126	1.01645	2.2407	2.87124	1.29936	1.97376	1.44173	0.437745	0.531259	0.324769	0.572435	0.663186	0.681831	0.691349
