# Supplementary material for: The mechanosensitive Piezo1 channel is required for bone formation
Source: eLife journal article supplement (doi:10.7554/elife.47454), 2019-07-10
Supplement: supp [file c.xlsx]

## Sheet: Sheet1
	Ctrl-Piezo1fl/fl	HS-Piezo1fl/fl	Ctrl-Piezo1Ocn/Ocn	HS-Piezo1Ocn/Ocn
	1.04195	0.818142	0.536616	0.577149
	0.933131	0.808009	0.659976	0.759546
	0.938418	0.776728	0.660858	0.73972
	1.14769	0.774966	0.611073	0.573624
	1.07411	0.830478	0.504455	0.769238
	1.07676	0.704034	0.66262	0.759546
	0.991286	0.753378	0.515028	0.521196
	0.834883			0.58596
	0.961768
