# Supplementary material for: The mechanosensitive Piezo1 channel is required for bone formation
Source: eLife journal article supplement (doi:10.7554/elife.47454), 2019-07-10
Supplement: supp [file d.xlsx]

## Sheet: Sheet1
	Ctrl-Piezo1fl/fl	FSS-Piezo1fl/fl	Ctrl-Piezo1Ocn/Ocn	FSS-Piezo1Ocn/Ocn
	1.02035	2.00907	0.368203	0.351169
	1.1131	2.02928	0.314986	0.496056
	0.866552	2.26136	0.388805	0.45789
