# Supplementary material for: The mechanosensitive Piezo1 channel is required for bone formation
Source: eLife journal article supplement (doi:10.7554/elife.47454), 2019-07-10
Supplement: supp [file e.xlsx]

## Sheet: Sheet1
	Ctrl- Piezo1fl/fl	HS-Piezo1fl/fl	Ctrl-Piezo1Ocn/Ocn	HS-Piezo1Ocn/Ocn
PINP	13.153	12.0074	7.35436	6.5765
	15.5714	10.282	4.76619	11.1447
	21.5398	11.4417	5.38848	11.3427
	28.9931	11.4134	7.93422	12.5873
	27.0839	10.7487	8.81109	9.37681
	13.5207	9.9001	9.37681	10.5365
	13.8036	8.1888	7.1705	9.57481
	13.0116			13.153
	10.3385			9.98496
				11.569
Ocn	16.1526	10.1652	6.9551	10.5218
	14.2355	10.3947	9.22889	6.44239
	15.7513	11.3532	6.44239	5.92967
	16.1749	12.4678	5.77363	9.98682
	16.5761	7.35636	5.66217	6.21947
	15.8851	7.33407	6.79906	6.10801
	16.2641	9.78619	6.04113	10.611
	17.2672			6.17488
	17.5793			8.98368
				7.95824
