# Supplementary material for: The mechanosensitive Piezo1 channel is required for bone formation
Source: eLife journal article supplement (doi:10.7554/elife.47454), 2019-07-10
Supplement: supp [file f.xlsx]

## Sheet: Sheet1
	Control	MG
	184	80
	162	91
	602	31
	519	26
	639	55
	261	183
	255	68
	112	99
	88	244
	360	77
	75	33
	55	77
		54
