# Supplementary material for: The mechanosensitive Piezo1 channel is required for bone formation
Source: eLife journal article supplement (doi:10.7554/elife.47454), 2019-07-10
Supplement: supp [file f.xlsx]

## Sheet: Sheet1
	Ctrl-Piezo1fl/fl						HS-Piezo1fl/fl						Ctrl-Piezo1Ocn/Ocn						HS-Piezo1Ocn/Ocn
Alp	0.611952	1.13435	1.07156	1.08536	1.08472	1.01208	0.71336	0.484566	0.579609	0.682884	0.780869	0.66909	0.420992	0.285477	0.250054	0.212055	0.404349	0.213434	0.555358	0.219435	0.452656	0.201437	0.235289	0.218092
Bglap	0.900182	0.739717	0.77113	1.75578	0.843499	0.989688	0.689899	0.788915	0.631855	0.720879	0.475549	0.45924	0.321645	0.272287	0.427335	0.233217	0.493125	0.474768	0.370142	0.274246	0.39294	0.192408	0.397918	0.364173
Col1α1	1.08838	1.12803	0.947493	1.18623	0.817768	0.832097	0.850234	0.817768	0.532727	0.807463	0.727181	0.826266	0.245227	0.447547	0.539293	0.390815	0.572186	0.512017	0.485652	0.404969	0.319707	0.627631	0.528437	0.561748
