# Supplementary material for: The mechanosensitive Piezo1 channel is required for bone formation
Source: eLife journal article supplement (doi:10.7554/elife.47454), 2019-07-10
Supplement: supp [file F.xlsx]

## Sheet: Sheet1
		Ctrl-Piezo1fl/fl			FSS-Piezo1fl/fl			Ctrl-Piezo1Ocn/Ocn			FSS-Piezo1Ocn/Ocn
	Alp	0.796304	0.943704	0.847648	2.46201	3.08876	3.53398	0.651177	0.67733	0.482901	0.792725	0.863227	1.08919
	Bglap	1.08143	1.04145	0.877129	1.788	1.83918	1.52453	0.483256	0.666942	0.462956	0.75619	0.67107	0.637054
	Col1a1	1.05327	0.866097	1.08064	2.73826	1.9802	1.72188	0.165922	0.590767	0.547658	0.79335	0.741017	0.525869
