# Supplementary figures and images for: The mechanosensitive Piezo1 channel is required for bone formation
Source: eLife journal article supplement (doi:10.7554/elife.47454), 2019-07-10

Figure 3-figure supplement 1

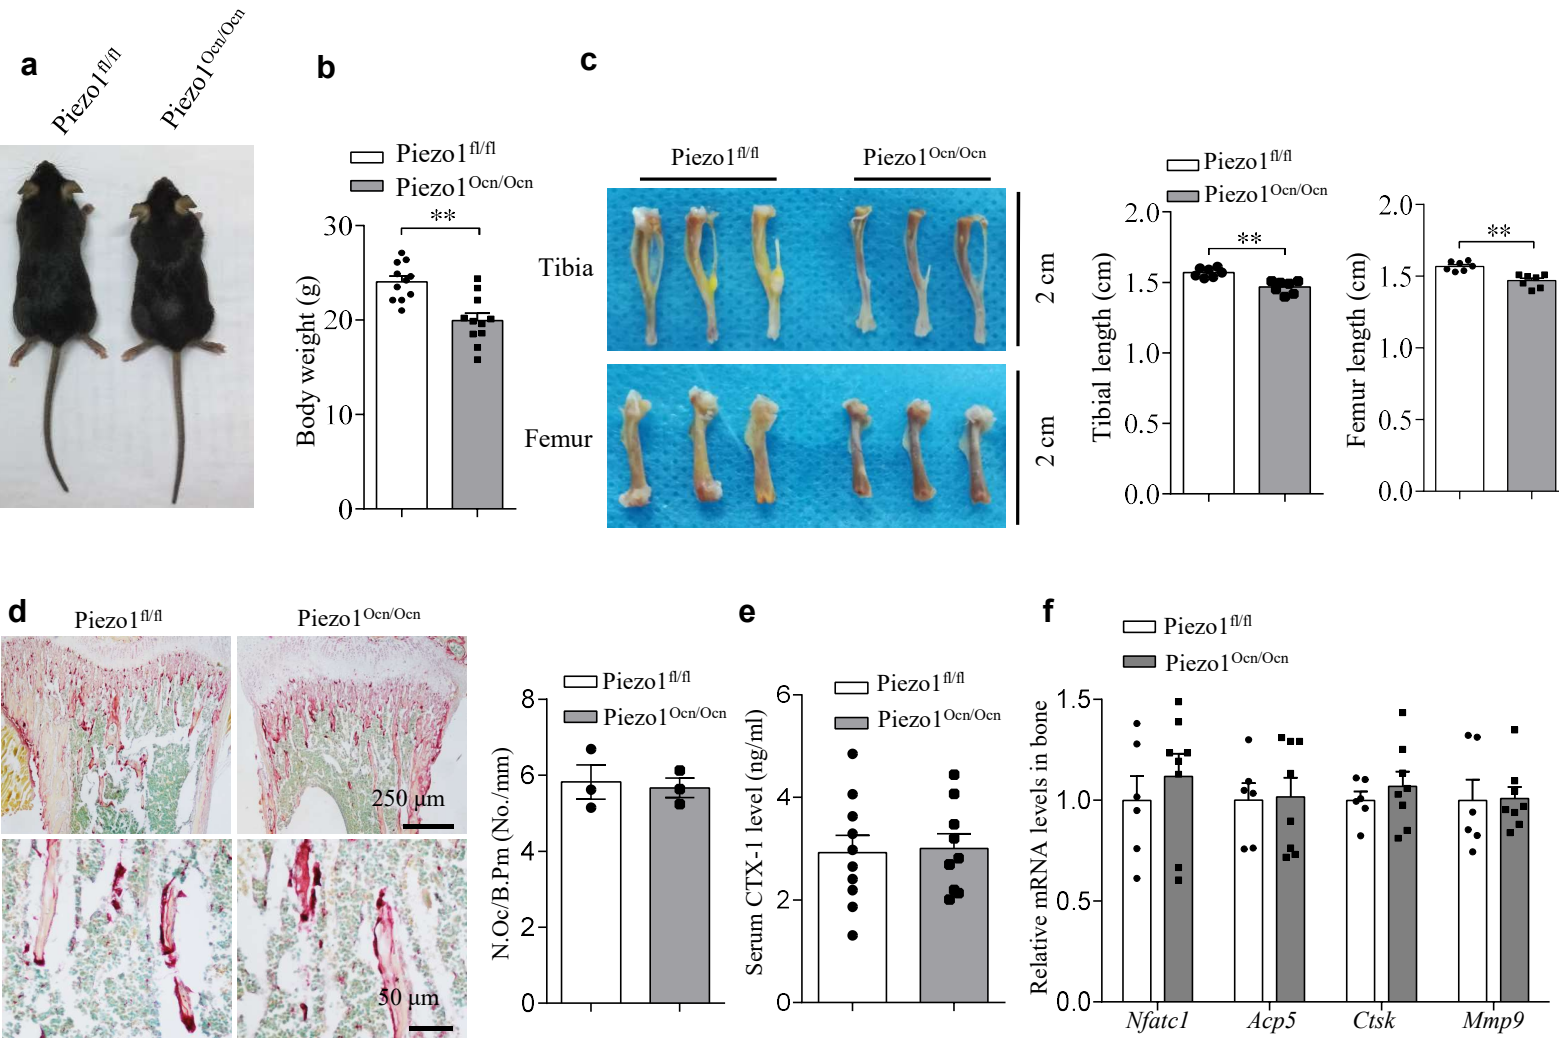

Supplement: supp [file elife-47454-supp-v1.zip]

Figure 2-figure supplement 1

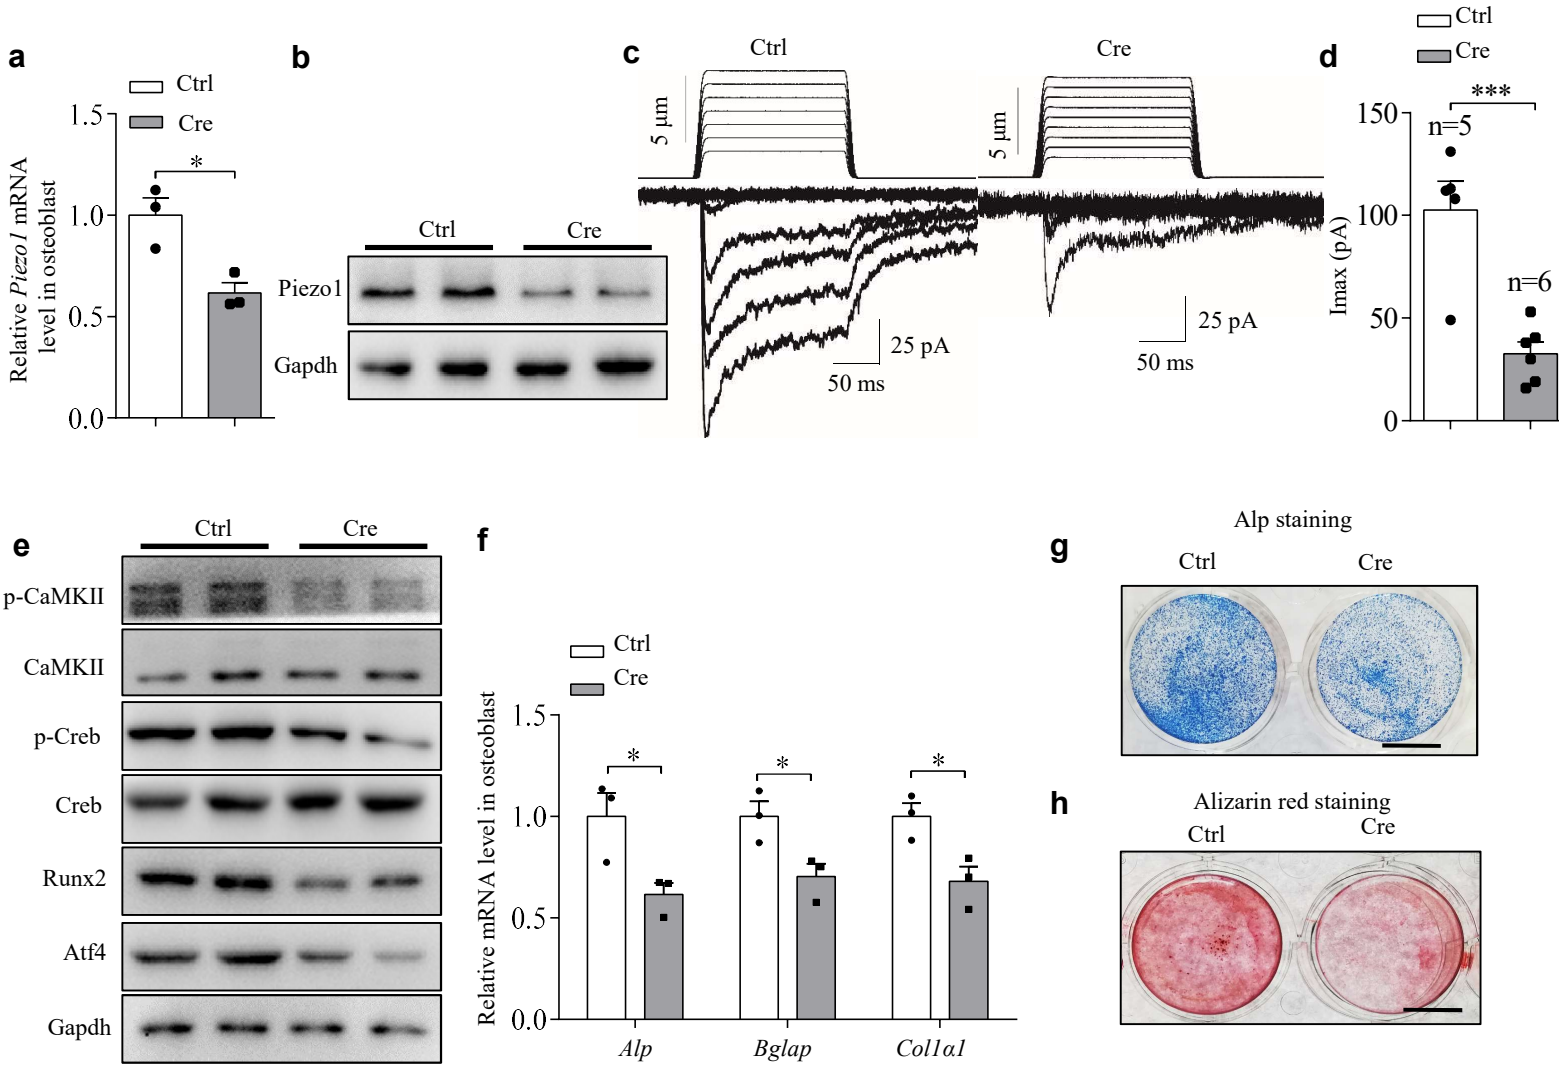

Supplement: supp [file elife-47454-supp-v1.zip]

**Figure 1-figure supplement 1**

**a**

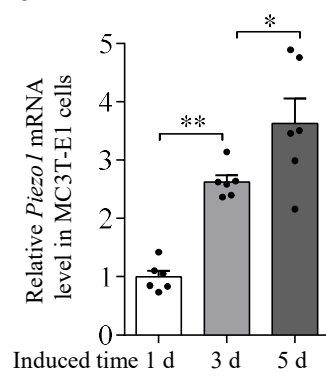

**b**

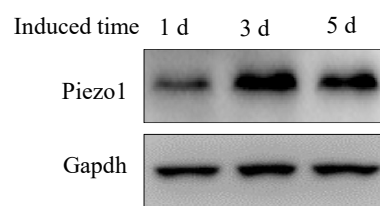

Supplement: supp [file elife-47454-supp-v1.zip]

**Figure 2-figure supplement 2**

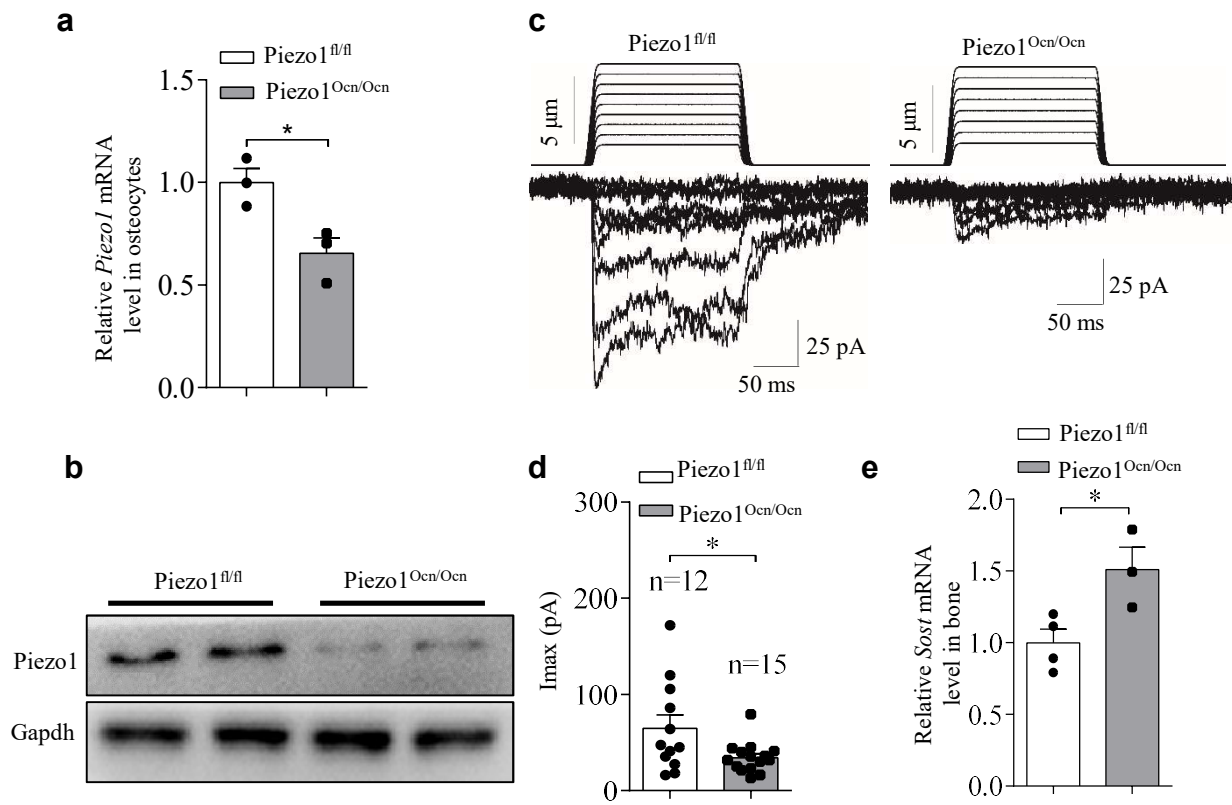

Supplement: supp [file elife-47454-supp-v1.zip]

**Figure 3-figure supplement 2**

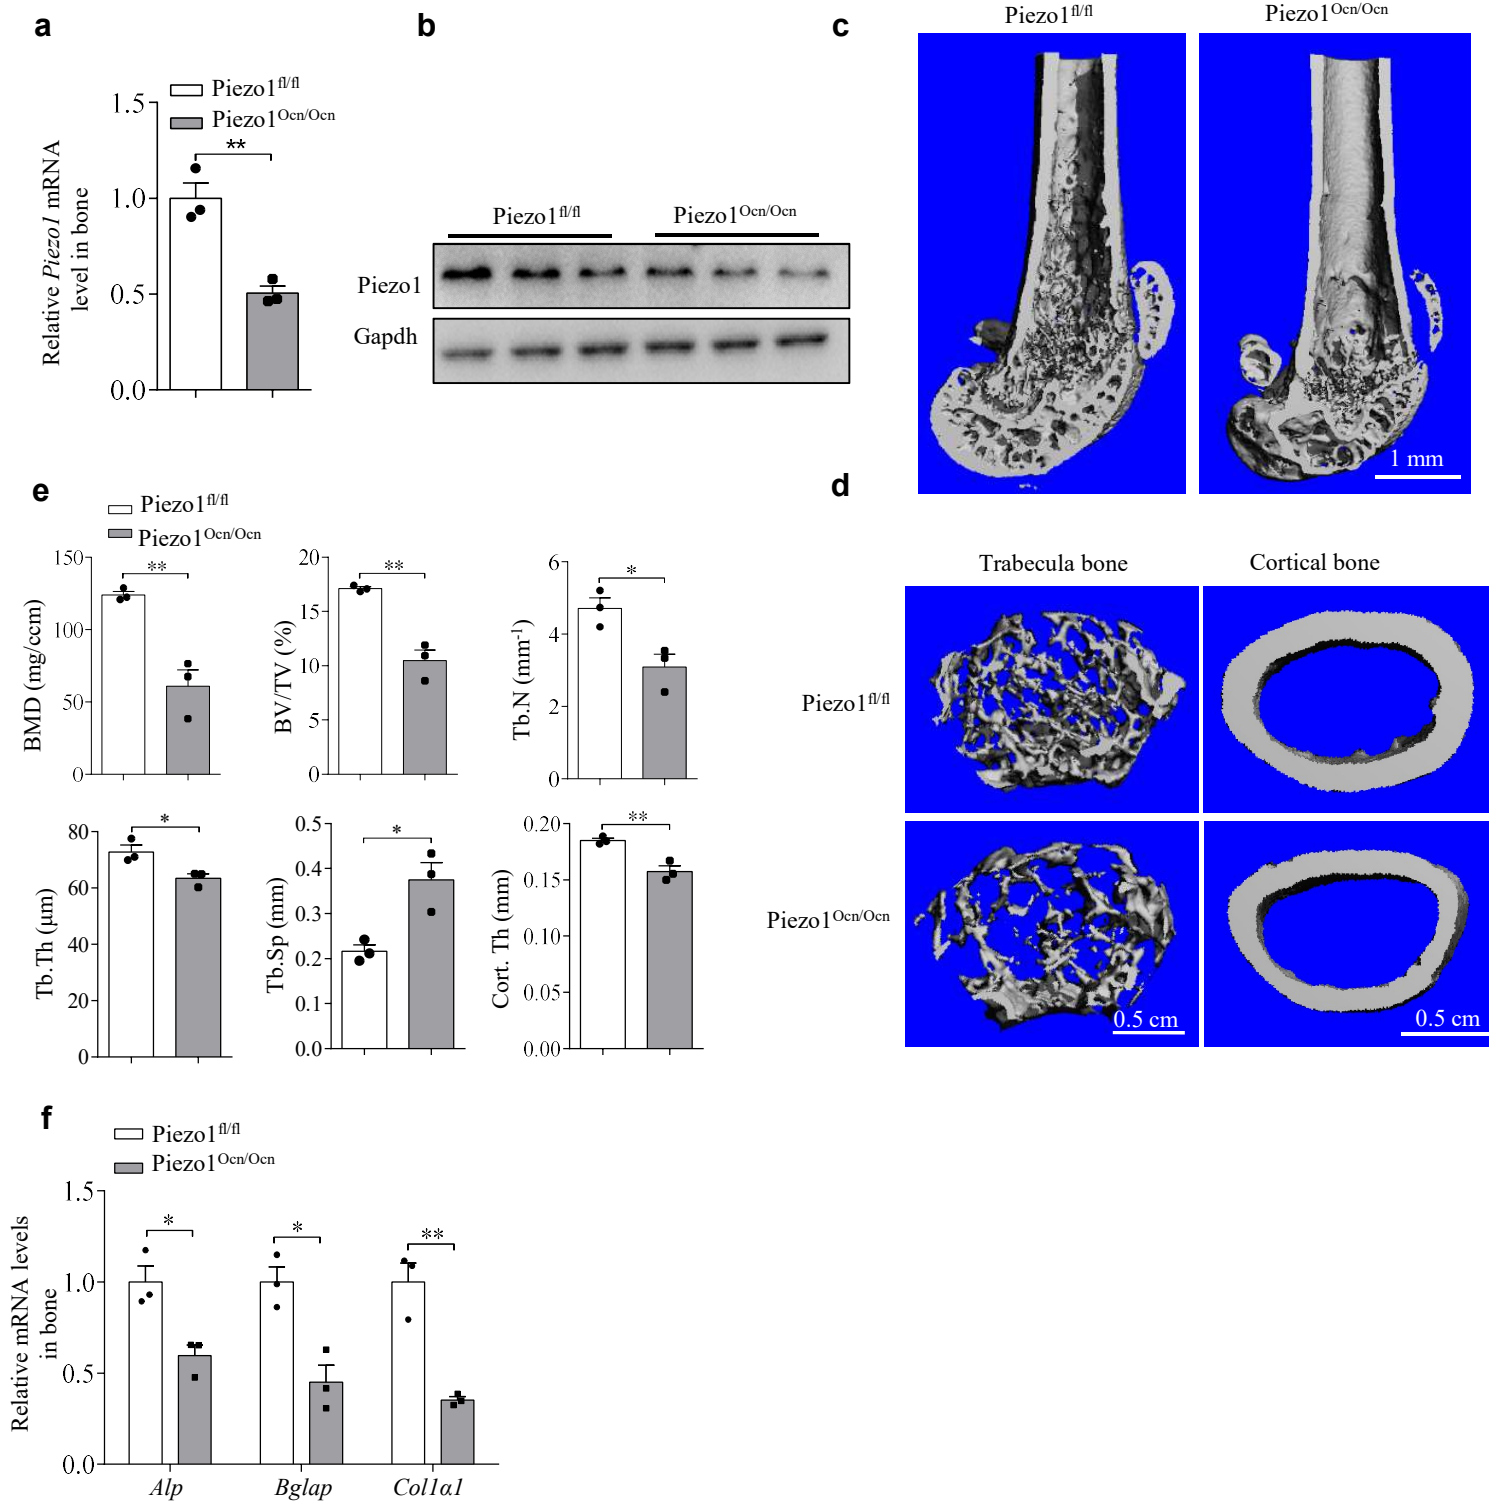

Supplement: supp [file elife-47454-supp-v1.zip]
